# Supplementary material
Source: ML conference proceedings conference paper supplement (https://proceedings.mlr.press/v108/fan20a.html)
Supplement: Supplementary file 2 [file fan20a-supp.zip]

Archive with 26 entries (23 files):
- Code_for_Online_BSP_Forest/
- __MACOSX/._Code_for_Online_BSP_Forest
- Code_for_Online_BSP_Forest/.DS_Store
- __MACOSX/Code_for_Online_BSP_Forest/._.DS_Store
- Code_for_Online_BSP_Forest/utility.py
- __MACOSX/Code_for_Online_BSP_Forest/._utility.py
- Code_for_Online_BSP_Forest/p_class.py
- __MACOSX/Code_for_Online_BSP_Forest/._p_class.py
- Code_for_Online_BSP_Forest/Main_Code.py
- __MACOSX/Code_for_Online_BSP_Forest/._Main_Code.py
- Code_for_Online_BSP_Forest/READ_ME
- __MACOSX/Code_for_Online_BSP_Forest/._READ_ME
- Code_for_Online_BSP_Forest/.idea/
- __MACOSX/Code_for_Online_BSP_Forest/._.idea
- Code_for_Online_BSP_Forest/.idea/inspectionProfiles/
- __MACOSX/Code_for_Online_BSP_Forest/.idea/._inspectionProfiles
- Code_for_Online_BSP_Forest/.idea/Online MF Code.iml
- __MACOSX/Code_for_Online_BSP_Forest/.idea/._Online MF Code.iml
- Code_for_Online_BSP_Forest/.idea/workspace.xml
- __MACOSX/Code_for_Online_BSP_Forest/.idea/._workspace.xml
- Code_for_Online_BSP_Forest/.idea/modules.xml
- __MACOSX/Code_for_Online_BSP_Forest/.idea/._modules.xml
- Code_for_Online_BSP_Forest/.idea/inspectionProfiles/profiles_settings.xml
- __MACOSX/Code_for_Online_BSP_Forest/.idea/inspectionProfiles/._profiles_settings.xml
- 208-supp.pdf
- __MACOSX/._208-supp.pdf
