# Supplementary material
Source: ML conference proceedings conference paper supplement (https://proceedings.mlr.press/v108/fan20a.html)
Supplement: Supplementary file 2 [file fan20a-supp.zip › Code_for_Online_BSP_Forest/READ_ME]

READ ME:

Please run Main_Code.py for a demonstration on the Friedman Function data.
